# Supplementary material for: Diagnostic value of a plasma microRNA signature in gastric cancer: a microRNA expression analysis
Source: PubMed Central journal article supplement (PMC4462022; doi:10.1038/srep11251), 2015-06-10

# Diagnostic value of a plasma microRNA signature in gastric cancer: a microRNA expression analysis

**Authors:** Xin Zhou<sup>1</sup>; Wei Zhu<sup>1</sup> \*; Hai Li<sup>2</sup>; Wei Wen<sup>3</sup>; Wenfang Cheng<sup>4</sup>; Fang Wang<sup>5</sup>; Yinxia Wu<sup>6</sup>; Lianwen Qi<sup>7</sup>; Yong Fan<sup>7</sup>; Yan Chen<sup>8</sup>; Yin Ding<sup>9</sup>; Jing Xu<sup>1</sup>; Jiaqi Qian<sup>1</sup>; Zebo Huang<sup>1</sup>; Tongshan Wang<sup>1</sup>; Danxia Zhu<sup>10</sup>; Yongqian Shu<sup>1,11</sup> \* ; Ping Liu<sup>1,11</sup> \*

**Institution:** 1.Department of Oncology, First Affiliated Hospital of Nanjing Medical University, 300 Guangzhou Road, Nanjing 210029, PR China;  
2.Department of Pathology, First Affiliated Hospital of Nanjing Medical University, 300 Guangzhou Road, Nanjing 210029, PR China;  
3.Department of Thoracic Surgery, First Affiliated Hospital of Nanjing Medical University, 300 Guangzhou Road, Nanjing 210029, PR China;  
4.Department of Gastroenterology, First Affiliated Hospital of Nanjing Medical University, 300 Guangzhou Road, Nanjing 210029, PR China;  
5.Department of Cardiology, First Affiliated Hospital of Nanjing Medical University, 300 Guangzhou Road, Nanjing 210029, PR China;  
6.Department of Oncology, Clinical Medical College of Yangzhou University, No. 98 Nantong Western road, Yangzhou 225001, PR China;  
7.State Key Laboratory of Natural Medicines and Department of Pharmacognosy, China Pharmaceutical University, No. 24 Tongjia Lane, Nanjing, 210009, China;  
8.Department of Emergency, First Affiliated Hospital of Nanjing Medical University, 300 Guangzhou Road, Nanjing 210029, PR China;  
9.State Key Laboratory of Analytical Chemistry for Life Science, School of Chemistry and Chemical Engineering, Nanjing University, No. 22 Hankou Road, Nanjing 210093, PR China;  
10.Department of Oncology, Third Affiliated Hospital of Soochow University, 185 Juqian Road, Changzhou 213003, PR China  
11.Cancer Center of Nanjing Medical University, Nanjing 210029, China.

\*Corresponding author: Dr. Wei Zhu, Prof. Yongqian Shu and Prof. Ping Liu.

Email address: [zhuwei@njmu.edu.cn](mailto:zhuwei@njmu.edu.cn), [shuyongqian@njmu.edu.cn](mailto:shuyongqian@njmu.edu.cn) and [liu-ping@csc.org.cn](mailto:liu-ping@csc.org.cn). Telephone: +86 139 1389 4911, +86-25-68136428, +86-25-68136930; Fax: +86 025 68136099.

**Table S1. Differently expressed miRNAs in the screening phase**

| MiRNA              | Fold change |       |       | Mean fold |
|--------------------|-------------|-------|-------|-----------|
|                    | Pool1       | Pool2 | Pool3 |           |
| <i>miR-103</i>     | 5.95        | 6.07  | 8.58  | 6.87      |
| <i>miR-106a</i>    | 3.17        | 4.38  | 5.33  | 4.29      |
| <i>miR-106b</i>    | 3.86        | 7.15  | 7.13  | 6.05      |
| <i>miR-107</i>     | 4.86        | 6.64  | 6.93  | 6.14      |
| <i>miR-151-5p</i>  | 4.31        | 7.30  | 12.03 | 7.88      |
| <i>miR-15b</i>     | 2.77        | 3.62  | 5.55  | 3.98      |
| <i>miR-17</i>      | 4.85        | 4.43  | 9.33  | 6.21      |
| <i>miR-182</i>     | 4.02        | 3.24  | 15.15 | 7.47      |
| <i>miR-185</i>     | 2.68        | 4.39  | 5.19  | 4.09      |
| <i>miR-19a</i>     | 3.88        | 2.52  | 8.14  | 4.84      |
| <i>miR-20a</i>     | 3.00        | 4.02  | 6.38  | 4.47      |
| <i>miR-21</i>      | 4.81        | 5.84  | 12.16 | 7.61      |
| <i>miR-210</i>     | 2.04        | 4.68  | 3.97  | 3.56      |
| <i>miR-223</i>     | 3.13        | 4.51  | 10.63 | 6.09      |
| <i>miR-23a</i>     | 2.26        | 3.36  | 5.92  | 3.85      |
| <i>miR-25</i>      | 1.88        | 2.75  | 2.48  | 2.37      |
| <i>miR-320a</i>    | 3.62        | 3.90  | 4.53  | 4.02      |
| <i>miR-335</i>     | 1.92        | 3.55  | 6.18  | 3.88      |
| <i>miR-421</i>     | 3.15        | 4.01  | 12.73 | 6.63      |
| <i>miR-532-5p</i>  | 3.67        | 1.87  | 2.86  | 2.80      |
| <i>miR-584</i>     | 3.07        | 3.86  | 7.25  | 4.73      |
| <i>miR-652</i>     | 2.46        | 2.88  | 3.66  | 3.00      |
| <i>miR-92b</i>     | 2.05        | 1.67  | 3.91  | 2.54      |
| <i>miR-16</i>      | 2.45        | 2.64  | 3.60  | 2.90      |
| <i>miR-128</i>     | 3.09        | 4.90  | 8.42  | 5.47      |
| <i>miR-181a</i>    | 5.89        | 7.39  | 9.54  | 7.61      |
| <i>miR-199a-5p</i> | 3.54        | 5.68  | 9.48  | 6.24      |
| <i>miR-26a</i>     | 5.98        | 12.20 | 11.90 | 10.03     |
| <i>miR-320b</i>    | 2.42        | 3.67  | 4.07  | 3.39      |
| <i>miR-125a-5p</i> | -2.62       | -4.27 | -1.94 | -2.95     |
| <i>miR-133b</i>    | -1.99       | -2.29 | -2.09 | -2.13     |
| <i>miR-133a</i>    | -2.63       | -3.30 | -2.87 | -2.93     |
| <i>miR-365</i>     | -1.72       | -5.52 | -3.99 | -3.74     |

**Table S2. Expression levels of miRNAs identified from screening phase but not passed through the training stage (presented as mean  $\pm$ SD; fmol/L).**

| MiRNA              | Controls          | Cases             | FC   | P value |
|--------------------|-------------------|-------------------|------|---------|
| <i>miR-106a</i>    | 604 $\pm$ 190     | 1985 $\pm$ 1767   | 3.29 | 0.10    |
| <i>miR-107</i>     | 412 $\pm$ 403     | 492 $\pm$ 300     | 1.19 | 0.52    |
| <i>miR-128</i>     | 985 $\pm$ 1062    | 835 $\pm$ 807     | 0.85 | 0.94    |
| <i>miR-133a</i>    | 156 $\pm$ 235     | 36.4 $\pm$ 28.3   | 0.23 | 0.49    |
| <i>miR-133b</i>    | 115 $\pm$ 171     | 26.1 $\pm$ 19.4   | 0.23 | 0.85    |
| <i>miR-151-5p</i>  | 275 $\pm$ 106     | 351 $\pm$ 151     | 1.28 | 0.19    |
| <i>miR-15b</i>     | 107 $\pm$ 62.1    | 203 $\pm$ 136     | 1.89 | 0.26    |
| <i>miR-16</i>      | 14060 $\pm$ 10829 | 21122 $\pm$ 12051 | 1.50 | 0.20    |
| <i>miR-182</i>     | 19.7 $\pm$ 11.9   | 24.3 $\pm$ 15.8   | 1.23 | 0.51    |
| <i>miR-199a-5p</i> | 44.7 $\pm$ 24.2   | 105 $\pm$ 120     | 2.35 | 0.52    |
| <i>miR-21</i>      | 658 $\pm$ 300     | 1358 $\pm$ 1130   | 2.06 | 0.20    |
| <i>miR-223</i>     | 35393 $\pm$ 15857 | 56570 $\pm$ 41424 | 1.60 | 0.34    |
| <i>miR-23a</i>     | 947 $\pm$ 413     | 1698 $\pm$ 1455   | 1.79 | 0.77    |
| <i>miR-26a</i>     | 1026 $\pm$ 415    | 5084 $\pm$ 5807   | 4.96 | 0.09    |
| <i>miR-320a</i>    | 12069 $\pm$ 3199  | 20990 $\pm$ 18046 | 1.74 | 0.67    |
| <i>miR-320b</i>    | 1302 $\pm$ 319    | 2265 $\pm$ 1763   | 1.74 | 0.90    |
| <i>miR-335</i>     | 125 $\pm$ 70.8    | 106 $\pm$ 62.3    | 0.85 | 0.63    |
| <i>miR-365</i>     | 352 $\pm$ 562     | 33.9 $\pm$ 33.7   | 0.10 | 0.89    |
| <i>miR-421</i>     | 324 $\pm$ 233     | 348 $\pm$ 175     | 1.07 | 0.12    |
| <i>miR-532-5p</i>  | 34.3 $\pm$ 28.8   | 54.5 $\pm$ 40.9   | 1.59 | 0.38    |
| <i>miR-584</i>     | 158 $\pm$ 118     | 345 $\pm$ 377     | 2.18 | 0.76    |
| <i>miR-652</i>     | 34 $\pm$ 12.9     | 86.1 $\pm$ 78.3   | 2.53 | 0.23    |

FC: fold change

**Table S3. Expression levels of the other 6 miRNAs in the training and testing stages (presented as mean  $\pm$ SD; fmol/L).**

| MiRNA              | Training stage  |                 |      |         | Testing stage   |                 |      |         | Combined |         |
|--------------------|-----------------|-----------------|------|---------|-----------------|-----------------|------|---------|----------|---------|
|                    | Controls        | Cases           | FC   | P value | Controls        | Cases           | FC   | P value | FC       | P value |
| <i>miR-103-1</i>   | 94.3 $\pm$ 49.2 | 261 $\pm$ 169   | 2.77 | <0.001  | 88.6 $\pm$ 51.3 | 97.2 $\pm$ 79   | 1.10 | 0.23    | 1.55     | 0.58    |
| <i>miR-106b</i>    | 543 $\pm$ 290   | 1576 $\pm$ 852  | 2.90 | <0.001  | 1619 $\pm$ 1556 | 1181 $\pm$ 926  | 0.73 | 0.47    | 0.86     | 0.81    |
| <i>miR-17</i>      | 972 $\pm$ 797   | 1976 $\pm$ 1248 | 2.03 | 0.003   | 972 $\pm$ 670   | 1225 $\pm$ 1018 | 1.26 | 0.79    | 1.48     | 0.32    |
| <i>miR-181a</i>    | 22.5 $\pm$ 13   | 72.7 $\pm$ 56   | 3.23 | <0.001  | 30.6 $\pm$ 19.7 | 43.1 $\pm$ 34.3 | 1.41 | 0.50    | 1.14     | 0.48    |
| <i>miR-19a</i>     | 1097 $\pm$ 1070 | 1957 $\pm$ 1378 | 1.78 | 0.003   | 927 $\pm$ 769   | 1047 $\pm$ 805  | 1.13 | 0.13    | 1.35     | 0.15    |
| <i>miR-125a-5p</i> | 29.2 $\pm$ 14.7 | 77.7 $\pm$ 66.6 | 2.66 | 0.032   | 30.7 $\pm$ 16.1 | 33.9 $\pm$ 25.8 | 1.10 | 0.33    | 1.56     | 0.72    |

FC: fold change

**Table S4. Expression levels of the five miRNAs in the external cohort (presented as mean  $\pm$ SD; fmol/L).**

| <b>MiRNA</b>   | <b>Controls</b> | <b>Cases</b>    | <b>FC</b> | <b>P value</b> |
|----------------|-----------------|-----------------|-----------|----------------|
| <i>miR-185</i> | 58.4 $\pm$ 20.3 | 135 $\pm$ 64.7  | 2.32      | <0.001         |
| <i>miR-20a</i> | 2493 $\pm$ 1003 | 5356 $\pm$ 3739 | 2.15      | 0.046          |
| <i>miR-210</i> | 13.2 $\pm$ 7.13 | 42.3 $\pm$ 36.9 | 3.21      | 0.022          |
| <i>miR-25</i>  | 925 $\pm$ 363   | 2570 $\pm$ 1881 | 2.78      | 0.004          |
| <i>miR-92b</i> | 9.2 $\pm$ 6.4   | 44.4 $\pm$ 28.4 | 4.82      | <0.001         |

FC: fold change

**Table S5. Analyses of the five miRNAs in the peripheral plasma compared to those in the arterial plasma (presented as mean  $\pm$ SD; fmol/L).**

| <b>MiRNA</b>   | <b>Peripheral</b> | <b>Arterial</b> | <b>FC</b> | <b>P value</b> |
|----------------|-------------------|-----------------|-----------|----------------|
| <i>miR-185</i> | 128 $\pm$ 79.8    | 56.3 $\pm$ 29.9 | 0.44      | <0.001         |
| <i>miR-20a</i> | 5646 $\pm$ 4132   | 7720 $\pm$ 4627 | 1.37      | 0.008          |
| <i>miR-210</i> | 36.8 $\pm$ 27.6   | 86.4 $\pm$ 94.5 | 2.35      | 0.013          |
| <i>miR-25</i>  | 1781 $\pm$ 1289   | 1754 $\pm$ 919  | 0.98      | 0.14           |
| <i>miR-92b</i> | 31 $\pm$ 20       | 103 $\pm$ 93.7  | 3.34      | <0.001         |

FC: fold change

**Table S6. Expression levels of the five miRNAs in the peripheral exosomes of 10 GC patients and controls (presented as mean  $\pm$ SD;  $\Delta$  Ct).**

| <b>MiRNA</b>   | <b>Controls</b> | <b>Cases</b>     | <b>P value</b> |
|----------------|-----------------|------------------|----------------|
| <i>miR-185</i> | 8.3 $\pm$ 0.5   | 8.36 $\pm$ 0.74  | 0.93           |
| <i>miR-20a</i> | 4.59 $\pm$ 1.35 | 4.5 $\pm$ 2.35   | 0.95           |
| <i>miR-210</i> | 7.2 $\pm$ 0.75  | 7.87 $\pm$ 0.998 | 0.37           |
| <i>miR-25</i>  | 2.91 $\pm$ 0.7  | 3.74 $\pm$ 2     | 0.63           |
| <i>miR-92b</i> | 7.84 $\pm$ 1.03 | 8.38 $\pm$ 0.38  | 0.29           |

$\Delta$  Ct=Ct<sub>miRNA</sub>-Ct<sub>cel-miR-39</sub>

**Table S7. KEGG pathway analysis of the five identified miRNAs**

| Analysis for<br><i>miR-185</i>    | P Value         | Analysis for<br><i>miR-20a</i> | P Value     | Analysis for<br><i>miR-210</i>          | P Value     | Analysis for <i>miR-25</i>       | P Value         | Analysis for<br><i>miR-92b</i>   | P Value     |
|-----------------------------------|-----------------|--------------------------------|-------------|-----------------------------------------|-------------|----------------------------------|-----------------|----------------------------------|-------------|
| Long-term depression              | 0.00378729<br>2 | Endocytosis                    | 7.43059E-07 | Glycosaminoglycan biosynthesis          | 0.002932615 | FoxO signaling pathway           | 0.00132694<br>7 | FoxO signaling pathway           | 0.000905768 |
| Axon guidance                     | 0.00458146<br>8 | Bladder cancer                 | 1.91037E-05 | Hepatitis B                             | 0.007958193 | Proteoglycans in cancer          | 0.00636416<br>7 | Proteoglycans in cancer          | 0.00423138  |
| Arachidonic acid metabolism       | 0.00522284<br>7 | MAPK signaling pathway         | 0.000051156 | Prostate cancer                         | 0.01244564  | Circadian entrainment            | 0.00731589<br>7 | Circadian entrainment            | 0.005575269 |
| Glutamatergic synapse             | 0.00866266<br>6 | Pathways in cancer             | 0.000146801 | Cholinergic synapse                     | 0.02346261  | Focal adhesion                   | 0.01283991      | Regulation of actin cytoskeleton | 0.01323466  |
| Glutathione metabolism            | 0.00879073<br>6 | TGF-beta signaling pathway     | 0.000571692 | Neuroactive ligand-receptor interaction | 0.02904973  | Regulation of actin cytoskeleton | 0.01862526      | MicroRNAs in cancer              | 0.01627407  |
| Ovarian steroidogenesis           | 0.00879073<br>6 | Chronic myeloid leukemia       | 0.00075198  | Cocaine addiction                       | 0.03034573  | PI3K-Akt signaling pathway       | 0.01909808      | Focal adhesion                   | 0.01936393  |
| Adherens junction                 | 0.00985601<br>5 | Pancreatic cancer              | 0.000984466 | Non-small cell lung cancer              | 0.03737776  | Calcium signaling pathway        | 0.01991651      | Nicotine addiction               | 0.02152255  |
| Thyroid hormone signaling pathway | 0.01003826      | Axon guidance                  | 0.001373651 | Adrenergic signaling in cardiomyocytes  | 0.04737275  | Nicotine addiction               | 0.02504522      | RNA degradation                  | 0.02738345  |
| Ras signaling pathway             | 0.01178537      | Circadian rhythm               | 0.002602499 | Glioma                                  | 0.04896525  | ECM-receptor interaction         | 0.02754333      | Salivary secretion               | 0.02850573  |
| T cell receptor signaling pathway | 0.01556694      | Prostate cancer                | 0.004736787 |                                         |             | Small cell lung cancer           | 0.02754333      | Dilated cardiomyopathy           | 0.02850573  |
| VEGF signaling                    | 0.01822438      | mTOR signaling                 | 0.004936159 |                                         |             | Pantothenate and CoA             | 0.03231274      | Pantothenate and                 | 0.02918549  |

|                                    |            |                                         |             |                                             |            |                                        |            |
|------------------------------------|------------|-----------------------------------------|-------------|---------------------------------------------|------------|----------------------------------------|------------|
| pathway                            |            | pathway                                 |             | biosynthesis                                |            | CoA biosynthesis                       |            |
| Fatty acid elongation              | 0.01917427 | Melanoma                                | 0.005791707 | RNA degradation                             | 0.03298968 | Fc gamma R-mediated phagocytosis       | 0.03020303 |
| Sulfur relay system                | 0.02482611 | Hepatitis B                             | 0.006385244 | Adherens junction                           | 0.03298968 | Calcium signaling pathway              | 0.03128138 |
| GnRH signaling pathway             | 0.02801417 | Prolactin signaling pathway             | 0.006447754 | Salivary secretion                          | 0.03489878 | Adrenergic signaling in cardiomyocytes | 0.03842445 |
| Notch signaling pathway            | 0.03194996 | Glioma                                  | 0.008767568 | Dilated cardiomyopathy                      | 0.03489878 | PI3K-Akt signaling pathway             | 0.03982208 |
| Thyroid hormone synthesis          | 0.03444338 | Small cell lung cancer                  | 0.009396033 | Fc gamma R-mediated phagocytosis            | 0.03692706 | Pancreatic secretion                   | 0.04405333 |
| Endometrial cancer                 | 0.0411774  | Neurotrophin signaling pathway          | 0.01082131  | MicroRNAs in cancer                         | 0.04275079 | Phosphatidylinositol signaling system  | 0.04464773 |
| Vascular smooth muscle contraction | 0.04684041 | TNF signaling pathway                   | 0.01167103  | Amino sugar and nucleotide sugar metabolism | 0.04613568 | Glycosaminoglycan biosynthesis         | 0.04478341 |
|                                    |            | Transcriptional misregulation in cancer | 0.01218648  | Adrenergic signaling in cardiomyocytes      | 0.04876366 |                                        |            |
|                                    |            | FoxO signaling pathway                  | 0.01230724  | Glycosaminoglycan biosynthesis              | 0.04940756 |                                        |            |
|                                    |            | Regulation of actin cytoskeleton        | 0.01238419  |                                             |            |                                        |            |
|                                    |            | Cell cycle                              | 0.01439141  |                                             |            |                                        |            |

---

|                                             |            |
|---------------------------------------------|------------|
| Renal cell carcinoma                        | 0.0262943  |
| PI3K-Akt signaling pathway                  | 0.02682305 |
| Non-small cell lung cancer                  | 0.02744885 |
| Estrogen signaling pathway                  | 0.02849083 |
| p53 signaling pathway                       | 0.03124715 |
| HTLV-I infection                            | 0.03405508 |
| Wnt signaling pathway                       | 0.0363052  |
| Rap1 signaling pathway                      | 0.03660535 |
| Protein processing in endoplasmic reticulum | 0.04371815 |
| Osteoclast differentiation                  | 0.0452136  |
| Dopaminergic synapse                        | 0.0452136  |

---

Figure S1 Receiver-operating characteristic (ROC) curve analyses of each miRNA to discriminate GC patients from normal controls in the combined two cohorts

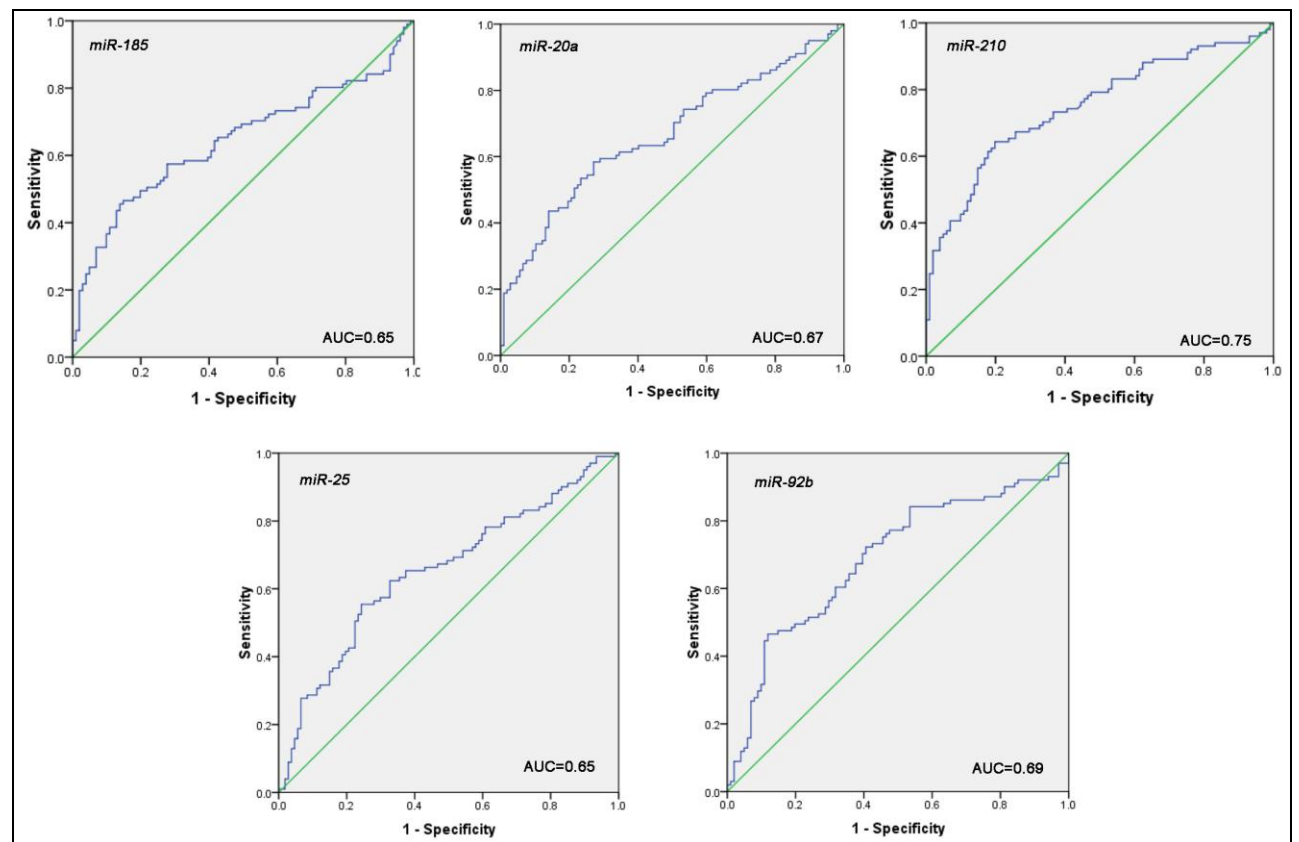

Supplement: srep11251-s1.pdf [file srep11251-s1.pdf]
